# Supplementary material for: Aquatic Vegetation Loss and Its Implication on Climate Regulation in a Protected Freshwater Wetland of Po River Delta Park (Italy)
Source: MDPI journal article supplement (doi:10.3390/w14010117), 2022-01-05
Supplement: s1 [file s1]

## Supplementary material

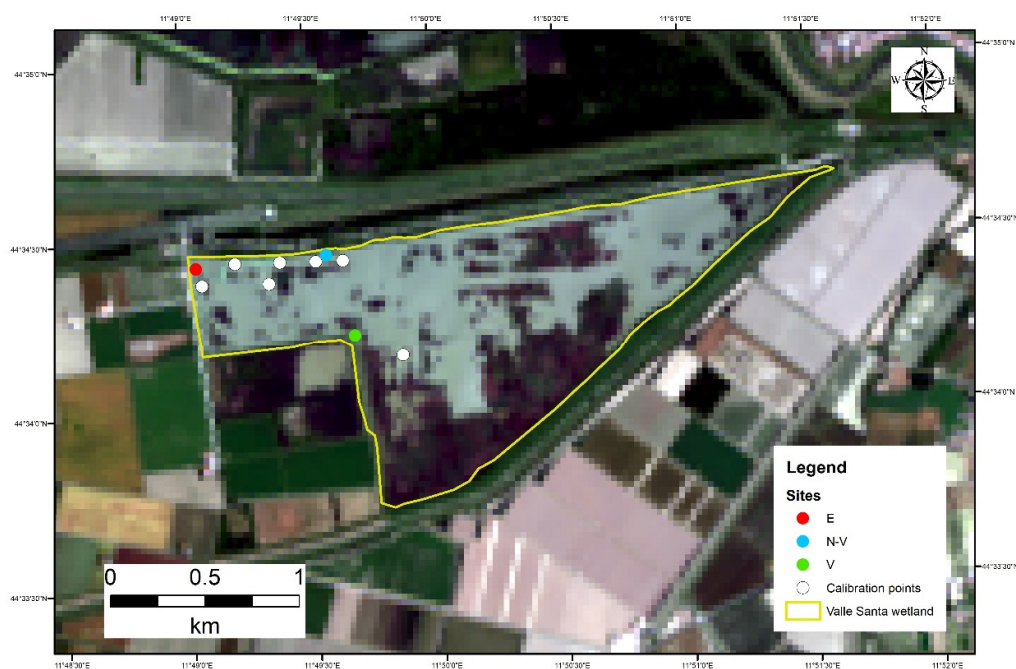

**Figure S1.** Location of the sampling stations, including the 7 points for biomass calibration and the 3 points for water sampling (E=entrance; N-V=non vegetated site; V=vegetated site). Experimental measures of breakdown rate (i.e. mesh bags) were carried out in N-V and V stations.
